# Supplementary material for: Synthesis of tricyclic vinylcyclobutanes and their application in photoinduced electron transfer chemistry
Source: Royal Society of Chemistry journal article supplement (doi:10.1039/b505659d), 2005-06-27
Supplement: b505659d.pdf [file b505659d.pdf]

# Synthesis of Tricyclic Vinylcyclobutanes and their Application in Photoinduced Electron Transfer Chemistry

Juliane Grota and Jochen Mattay\*

*Organische Chemie I, Fakultät für Chemie, Universität Bielefeld, Postfach 100131, 33501 Bielefeld, Germany*  
Fax: +49(521)1066417; Tel: +49(521)1062072; E-mail: mattay@uni-bielefeld.de

## Supplementary Materials

### Synthesis of Vinylcyclobutanes 1a-j by Peterson olefination of tricyclic ketones 2a-j

The synthesis of tricyclic ketones **2a-j** has been reported separately.<sup>1,2</sup>

**General procedure A of synthesis of (trimethylsilyl)methylithium (4)<sup>3</sup>:** To a refluxing suspension of lithium sand (982 mg, 141 mmol) in 75 mL *n*-pentane under argon atmosphere (chloromethyl)trimethylsilane (8.66 g, 71 mmol) was added dropwise. The mixture was heated under reflux for 8 h and cooled to r.t. After 12 h without stirring the mixture had separated into a colorless solution and a purple residue. The colorless solution of **4** was taken out with a syringe immediately before use.

**General procedure B of synthesis of tricyclic  $\beta$ -trimethylsilyl alcohols 3a-j<sup>3</sup>:** 17 mL of the solution of **4**, made according to procedure A, were diluted with 50 mL anhyd Et<sub>2</sub>O. A solution of the ketone (3 mmol) in 10 mL anhyd Et<sub>2</sub>O was added dropwise. The mixture was heated under reflux for 3-6 h. Conversion was controlled by GC. Under cooling to 0°C aq NH<sub>4</sub>Cl (25%, 10 mL) was added. After addition of H<sub>2</sub>O (100 mL) the mixture was extracted with Et<sub>2</sub>O (3 x 75 mL). The combined organic layers were washed with H<sub>2</sub>O (50 mL) and dried (Na<sub>2</sub>SO<sub>4</sub>). The solvents were evaporated under reduced pressure. The residue was purified by Kugelrohr distillation and flash chromatography (cyclohexane).

**General procedure C of synthesis of vinylcyclobutanes 1a-j<sup>4</sup>:** A suspension of KH in paraffin (1 g) was washed under an argon atmosphere with *n*-pentane (2 x 10 mL) and suspended in anhyd THF (15 mL). A solution of alcohol **3** (1.5 mmol) in anhyd THF (10 mL) was added dropwise. After stirring at r.t. for 2 h the mixture was added to cold aq NH<sub>4</sub>Cl (10%, 50 mL) overlaid with Et<sub>2</sub>O (100 mL). The organic layer was separated and dried (MgSO<sub>4</sub>). The solvents were evaporated under reduced pressure. The residue was purified by Kugelrohr distillation and flash chromatography (cyclohexane).

#### *cis,anti,cis*-3-[(Trimethylsilyl)methyl]-tricyclo[5.3.0.0<sup>2,6</sup>]decan-3-ol (**3a**)

**3a** was obtained from **2a** according to procedure B.

Yield: 81 %, colorless oil.

IR (film): 3488, 2948, 2870, 1465, 1447, 1415, 1361, 1287, 1246, 1175, 1150, 1118, 1056, 1043, 1018, 996, 891, 839, 762, 688 cm<sup>-1</sup>.

<sup>1</sup>H-NMR (C<sub>6</sub>H<sub>6</sub>):  $\delta$  = 0.169 (s, 9 H, Si(CH<sub>3</sub>)<sub>3</sub>), 1.067 (s, 1 H, OH), 0.728 (d, 1 H, *J* = 14.8 Hz, 11-H), 0.811 (d, 1 H, *J* = 14.8 Hz, 11-H), 1.327-1.435 (m, 3 H), 1.457-1.529 (m, 2 H), 1.546-1.660 (m, 3 H), 1.676-1.738 (m, 2 H), 1.790 (ddd, 1 H, *J* = 6.8 Hz, 6.8 Hz, 3.2 Hz), 1.812-1.880 (m, 1 H), 1.932 (ddd, 1 H, *J* = 7.0 Hz, 7.0 Hz, 3.0 Hz), 2.264 (ddd, 1 H, *J* = 6.9 Hz, 6.9 Hz, 3.6 Hz).

<sup>13</sup>C-NMR (C<sub>6</sub>D<sub>6</sub>):  $\delta$  = 0.85 (Si(CH<sub>3</sub>)<sub>3</sub>), 25.50 (CH<sub>2</sub>), 30.30 (CH<sub>2</sub>), 30.59 (CH<sub>2</sub>), 33.41 (CH<sub>2</sub>), 33.63 (CH<sub>2</sub>), 36.09 (CH), 40.44 (CH<sub>2</sub>), 40.69 (CH), 42.29 (CH), 53.21 (CH), 81.97 (C<sub>q</sub>, C-3).

GC/MS (EI, 70 eV): *m/z* (%) = 238 (0.9) [M<sup>+</sup>], 155 (10), 115 (33), 91 (15), 80 (13), 79 (21), 75 (72), 74 (12), 73 (100) [Si(CH<sub>3</sub>)<sub>3</sub><sup>+</sup>], 67 (17), 66 (11), 45 (16), 41 (10).

HRMS: *m/z* calcd for C<sub>14</sub>H<sub>26</sub>OSi (M<sup>+</sup>), 238.17529; found, 238.17556.

#### *cis,anti,cis*-6-Methyl-3-[(trimethylsilyl)methyl]-tricyclo[5.3.0.0<sup>2,6</sup>]decan-3-ol (**3c**)

**3c** was obtained from **2c** according to procedure B.

Yield: 82 %, colorless oil.

IR (film): 3491, 2948, 2867, 1730, 1448, 1415, 1373, 1289, 1246, 1220, 1155, 1107, 1059, 1021, 1006, 883, 838, 689  $\text{cm}^{-1}$ .

$^1\text{H-NMR}$  ( $\text{C}_6\text{D}_6$ ):  $\delta$  = 0.181 (s, 9 H,  $\text{Si}(\text{CH}_3)_3$ ), 0.754 (dd, 1 H,  $J$  = 14.8 Hz, 1.1 Hz, 11-H), 0.850 (s, 3 H, 12-H), 0.870 (d, 1 H,  $J$  = 14.8 Hz, 11-H), 1.018 (s, 1 H, OH), 1.260 (dddd, 1 H,  $J$  = 12.9 Hz, 12.9 Hz, 7.7 Hz, 7.1 Hz), 1.327 (d, 1 H,  $J$  = 3.9 Hz), 1.353-1.420 (m, 3 H), 1.462 (dd, 1 H,  $J$  = 12.4 Hz, 6.2 Hz), 1.559 (dddd, 1 H,  $J$  = 12.5 Hz, 12.5 Hz, 12.4 Hz, 6.2 Hz, 6.2 Hz), 1.655-1.721 (m, 3 H), 1.917 (dd, 1 H,  $J$  = 10.4 Hz, 10.4 Hz), 1.968 (ddd, 1 H,  $J$  = 7.7 Hz, 7.7 Hz, 7.7 Hz), 2.207 (ddd, 1 H,  $J$  = 7.1 Hz, 7.1 Hz, 4.2 Hz).

$^{13}\text{C-NMR}$  ( $\text{C}_6\text{D}_6$ ):  $\delta$  = 0.97 ( $\text{CH}_3$ ,  $\text{Si}(\text{CH}_3)_3$ ), 21.16 ( $\text{CH}_3$ , C-12), 26.78 ( $\text{CH}_2$ ), 28.56 ( $\text{CH}_2$ ), 30.52 ( $\text{CH}_2$ ), 33.04 ( $\text{CH}_2$ ), 34.98 (CH), 40.08 ( $\text{CH}_2$ ), 40.66 ( $\text{CH}_2$ ), 41.02 ( $\text{C}_q$ , C-6), 45.19 (CH), 60.18 (CH), 82.09 ( $\text{C}_q$ , C-3).

GC/MS (EI, 70 eV):  $m/z$  (%) = 252 (<1) [ $\text{M}^+$ ], 115 (49), 97 (28), 91 (21), 79 (40), 77 (15), 75 (87), 73 (100) [ $\text{Si}(\text{CH}_3)_3^+$ ], 67 (20), 66 (15), 59 (10), 55 (13), 45 (20), 43 (10), 41 (14).

HRMS:  $m/z$  calcd for  $\text{C}_{15}\text{H}_{28}\text{OSi}$  ( $\text{M}^+$ ), 252.1909; found, 252.1910.

### ***cis,syn,trans*-6-Methyl-3-[(trimethylsilyl)methyl]-tricyclo[5.4.0.0<sup>2,6</sup>]undecan-3-ol (3d)**

**3d** was obtained from **2d** according to procedure B.

Yield: 87 %, colorless oil.

IR (film): 3503, 2931, 2858, 1444, 1247, 999, 839, 687, 664  $\text{cm}^{-1}$ .

$^1\text{H-NMR}$  ( $\text{C}_6\text{D}_6$ ):  $\delta$  = 0.169 (s, 9 H,  $\text{Si}(\text{CH}_3)_3$ ), 0.921 (s, 2 H, 12-H), 1.074 (s, 1 H, OH), 1.111 (s, 3 H, 13-H), 1.192-1.237 (m, 3 H), 1.288 (ddd, 1 H,  $J$  = 12.8 Hz, 10.0 Hz, 7.4 Hz), 1.506-1.534 (m, 1 H), 1.561 (ddd, 1 H,  $J$  = 12.8 Hz, 7.0 Hz, 3.6 Hz), 1.650-1.739 (m, 5 H), 1.779-1.818 (m, 1 H), 1.847 (ddd, 1 H,  $J$  = 13.0 Hz, 7.1 Hz, 3.6 Hz), 2.000 (d, 1 H,  $J$  = 7.4 Hz), 2.060 (ddd, 1 H,  $J$  = 13.0 Hz, 10.0 Hz, 7.1 Hz).

$^{13}\text{C-NMR}$  ( $\text{C}_6\text{D}_6$ ):  $\delta$  = 0.81 (3 C,  $\text{Si}(\text{CH}_3)_3$ ), 20.05, 26.77, 28.22, 28.66, 29.79, 34.76, 37.51, 41.16, 46.04, 47.92, 50.58, 61.48, 83.77 (C-3).

GC/MS (EI, 70 eV):  $m/z$  (%) = 266 (<1) [ $\text{M}^+$ ], 248 (3) [ $\text{M}^+ - \text{H}_2\text{O}$ ], 233 (2) [ $\text{M}^+ - \text{H}_2\text{O} - \text{CH}_3$ ], 136 (14), 115 (35), 107 (10), 105 (10), 97 (31), 93 (14), 91 (28), 81 (12), 79 (25), 77 (10), 75 (62), 74 (12), 73 (100) [ $\text{Si}(\text{CH}_3)_3^+$ ], 67 (13), 55 (16), 45 (19), 43 (10), 41 (17).

HRMS:  $m/z$  calcd for  $\text{C}_{16}\text{H}_{30}\text{OSi}$  ( $\text{M}^+$ ), 266.20659; found, 266.20662.

### **6-Methyl-3-[(trimethylsilyl)methyl]-tricyclo[n.m.0.0<sup>2,n+1</sup>]alkan-3-ols (3b,e-j)**

**3b,e-f** were obtained from **2b,e-f** according to procedure B in good yields (60-99 %) as colorless oils. Characterization was performed using GC/MS.

#### ***cis-anti-cis*-3-Methylen-tricyclo[5.3.0.0<sup>2,6</sup>]decane (1a)**

**1a** was obtained from **3a** according to procedure C.

Yield: 82 %, colorless oil.

IR (film): 3076, 2937, 2857, 1658, 1466, 1439, 1249, 1173, 1143, 1111, 1058, 1028, 1007, 880, 838, 664  $\text{cm}^{-1}$ .

$^1\text{H-NMR}$  ( $\text{C}_6\text{D}_6$ ):  $\delta$  = 1.285-1.410 (m, 2 H), 1.455-1.530 (m, 2 H), 1.549-1.628 (m, 2 H), 1.659-1.739 (m, 2 H), 1.998 (ddd, 1 H,  $J$  = 7.0 Hz, 7.0 Hz, 3.5 Hz), 2.068 (ddd, 1 H,  $J$  = 6.8 Hz, 6.8 Hz, 3.5 Hz), 2.192-2.261 (m, 2 H), 2.301 (dd, 1 H,  $J$  = 6.6 Hz, 2.7 Hz), 2.599-2.682 (m, 1 H), 4.827 (dd, 1 H,  $J$  = 1.9 Hz, 1.9 Hz, 11-H), 4.886 (dd, 1 H,  $J$  = 2.1 Hz, 2.1 Hz, 11-H).

$^{13}\text{C-NMR}$  ( $\text{C}_6\text{D}_6$ ):  $\delta$  = 25.27 ( $\text{CH}_2$ ), 32.79 ( $\text{CH}_2$ , 2 C), 33.43 ( $\text{CH}_2$ ), 33.54 ( $\text{CH}_2$ ), 42.22 (CH), 42.87 (CH), 43.68 (CH), 48.13 (CH), 104.20 ( $\text{CH}_2$ , C-11), 157.49 ( $\text{C}_q$ , C-3).

GC/MS (EI, 70 eV):  $m/z$  (%) = 148 (13) [ $\text{M}^+$ ], 133 (10), 120 (4), 119 (7), 117 (1), 107 (3), 106 (8), 105 (12), 103 (1), 93 (4), 92 (7), 91 (25), 82 (1), 81 (21), 79 (37), 79 (100), 78 (3), 77 (28), 69 (1), 68 (3), 67 (27), 66 (8), 65 (21), 63 (5), 62 (1), 59 (1), 58 (4), 55 (5), 54 (3), 53 (14), 52 (8), 51 (11), 50 (3), 42 (2), 41 (24), 40 (5), 39 (27), 29 (4), 27 (13).

HRMS:  $m/z$  calcd for  $\text{C}_{11}\text{H}_{16}$  ( $\text{M}^+$ ), 148.12520; found, 148.12520.

#### ***cis,syn,cis*-6-Methyl-3-methylen-tricyclo[5.3.0.0<sup>2,6</sup>]decane (1b)**

**1b** was obtained from **3b** according to procedure C.

Yield: 94 %, colorless oil.

IR (film): 3075, 2949, 2862, 1449, 880, 664  $\text{cm}^{-1}$ .

$^1\text{H-NMR}$  ( $\text{C}_6\text{D}_6$ ):  $\delta$  = 1.093-1.153 (m, 1 H), 1.145 (s, 3 H, 12-H), 1.321-1.611 (m, 5 H), 1.724-1.773 (m, 1 H), 1.730 (ddd, 1 H,  $J$  = 13.4 Hz, 8.9 Hz, 6.8 Hz), 2.265-2.429 (m, 3 H), 2.607 (dddd, 1 H,  $J$  = 9.7 Hz, 1.9 Hz, 1.9 Hz, 1.9 Hz), 2.741 (dddd, 1 H,  $J$  = 9.0 Hz, 9.0 Hz, 8.9 Hz, 2.7 Hz), 4.742 (dddd, 1 H,  $J$  = 2.0 Hz, 2.0 Hz, 2.0 Hz, 2.0 Hz, 11-H), 5.032 (dddd, 1 H,  $J$  = 2.0 Hz, 2.0 Hz, 2.0 Hz, 2.0 Hz, 11-H).

$^{13}\text{C-NMR}$  ( $\text{C}_6\text{D}_6$ ):  $\delta$  = 27.40 ( $\text{CH}_2$ ), 27.77 ( $\text{CH}_2$ ), 28.04 ( $\text{CH}_2$ ), 29.69 ( $\text{CH}_3$ , C-12), 33.07 ( $\text{CH}_2$ ), 36.11 ( $\text{CH}_2$ ), 36.31 (CH), 45.22 ( $\text{C}_q$ , C-6), 47.04 (CH), 50.13 (CH), 107.09 ( $\text{CH}_2$ , C-11), 154.33 ( $\text{C}_q$ , C-3).

GC/MS (EI, 70 eV):  $m/z$  (%) = 162 (9) [ $\text{M}^+$ ], 147 (62) [ $\text{M}^+-\text{CH}_3$ ], 134 (25), 133 (35), 120 (16), 119 (27), 107 (15), 106 (24), 105 (50), 95 (14), 94 (64), 93 (29), 92 (17), 91 (64), 81 (10), 80 (18), 79 (100), 78 (11), 77 (32), 67 (25), 65 (15), 55 (16), 53 (20), 51 (12), 41 (35), 39 (32), 29 (11), 27 (23).

HRMS:  $m/z$  calcd for  $\text{C}_{12}\text{H}_{18}$  ( $\text{M}^+$ ), 162.14085; found, 162.14059.

#### ***cis,anti,cis*-6-Methyl-3-methylen-tricyclo[5.3.0.0<sup>2,6</sup>]decane (1c)**

**1c** was obtained from **3c** according to procedure C.

Yield: 87 %, colorless oil.

IR (film): 3076, 2947, 2859, 1438, 1248, 879, 837  $\text{cm}^{-1}$ .

$^1\text{H-NMR}$  ( $\text{C}_6\text{D}_6$ ):  $\delta$  = 0.857 (s, 3 H, 12-H), 1.203-1.284 (m, 1 H, 8-H), 1.354 (dd, 1 H,  $J$  = 7.1 Hz, 7.1 Hz, 10-H), 1.426 (ddd, 1 H,  $J$  = 12.1 Hz, 12.1 Hz, 7.7 Hz, 5-H), 1.503-1.618 (m, 3 H, 5-H, 9-H, 10-H), 1.639-1.694 (m, 2 H, 8-H, 9-H), 1.905 (dddd, 1 H,  $J$  = 3.9 Hz, 0.9 Hz, 0.9 Hz, 0.9 Hz, 2-H), 2.103 (dd, 1 H,  $J$  = 7.5 Hz, 7.5 Hz, 7-H), 2.214 (ddd, 1 H,  $J$  = 7.3 Hz, 7.2 Hz, 3.8 Hz, 1-H), 2.249 (dddddd, 1 H,  $J$  = 14.5 Hz, 7.7 Hz, 2.0 Hz, 1.0 Hz, 1.0 Hz, 1.0 Hz, 4-H), 2.672 (dddddd, 1 H,  $J$  = 14.4 Hz, 11.9 Hz, 8.1 Hz, 2.5 Hz, 2.5 Hz, 1.1 Hz, 4-H), 4.769 (dddd, 1 H,  $J$  = 2.5 Hz, 1.7 Hz, 0.9 Hz, 0.9 Hz, 0.9 Hz, 11-H), 4.817 (dddd, 1 H,  $J$  = 2.1 Hz, 2.1 Hz, 1.0 Hz, 1.0 Hz, 11-H).

$^{13}\text{C-NMR}$  ( $\text{C}_6\text{D}_6$ ):  $\delta$  = 20.39 ( $\text{CH}_3$ , C-12), 26.72 ( $\text{CH}_2$ , C-9), 28.69 ( $\text{CH}_2$ , C-8), 32.78 ( $\text{CH}_2$ , C-10), 33.38 ( $\text{CH}_2$ , C-4), 42.14 (CH, C-1), 42.51 ( $\text{CH}_2$ , C-5), 43.31 ( $\text{C}_q$ , C-6), 45.29 (CH, C-7), 54.97 (CH, C-2), 103.41 ( $\text{CH}_2$ , C-11), 157.58 ( $\text{C}_q$ , C-3).

GC/MS (EI, 70 eV):  $m/z$  (%) = 162 (17) [ $\text{M}^+$ ], 147 (53) [ $\text{M}^+-\text{CH}_3$ ], 134 (18), 133 (24), 119 (18), 106 (10), 105 (29), 94 (31), 93 (17), 92 (11), 91 (42), 80 (14), 79 (100), 78 (14), 77 (38), 67 (29), 65 (21), 55 (14), 53 (20), 51 (12), 41 (30), 39 (30), 27 (19).

HRMS:  $m/z$  calcd for  $\text{C}_{12}\text{H}_{18}$  ( $\text{M}^+$ ), 162.1409; found, 162.1414.

#### ***cis,syn,trans*-6-Methyl-3-methylen-tricyclo[5.4.0.0<sup>2,6</sup>]undecane (1d)**

**1d** was obtained from **3d** according to procedure C.

Yield: 93 %, colorless oil.

IR (film): 3074, 2931, 2859, 1452, 887, 875, 835  $\text{cm}^{-1}$ .

$^1\text{H-NMR}$  ( $\text{C}_6\text{D}_6$ ):  $\delta$  = 1.136 (s, 3 H, 13-H), 1.147-1.590 (m, 9 H), 1.648-1.721 (m, 3 H), 2.482 (dddd, 1 H,  $J$  = 17.3 Hz, 9.3 Hz, 1.8 Hz, 1.8 Hz, 1.8 Hz), 2.606-2.694 (m, 2 H), 4.930-4.948 (m, 1 H, 12-H), 5.143 (dddd, 1 H,  $J$  = 2.2 Hz, 2.2 Hz, 2.1 Hz, 2.1 Hz, 12-H).

$^{13}\text{C-NMR}$  ( $\text{C}_6\text{D}_6$ ):  $\delta$  = 18.54 ( $\text{CH}_3$ , C-13), 26.78 ( $\text{CH}_2$ ), 26.87 ( $\text{CH}_2$ ), 27.98 ( $\text{CH}_2$ ), 28.32 ( $\text{CH}_2$ ), 34.80 ( $\text{CH}_2$ ), 37.50 ( $\text{CH}_2$ ), 42.15 (CH), 46.40 (CH), 52.85 ( $\text{C}_q$ , C-6), 54.01 (CH), 108.53 ( $\text{CH}_2$ , C-12), 153.34 ( $\text{C}_q$ , C-3).

GC/MS (EI, 70 eV):  $m/z$  (%) = 176 (10) [ $\text{M}^+$ ], 161 (11) [ $\text{M}^+-\text{CH}_3$ ], 148 (22), 147 (19), 133 (16), 119 (20), 108 (19), 107 (66), 106 (18), 105 (38), 95 (15), 94 (86), 93 (44), 92 (14), 91 (55), 81 (14), 80 (16), 79 (100), 77 (29), 67 (21), 65 (12), 55 (23), 41 (36), 39 (24), 29 (13), 27 (20).

HRMS:  $m/z$  calcd for  $\text{C}_{13}\text{H}_{20}$  ( $\text{M}^+$ ), 176.15650; found, 176.15618.

#### ***cis,anti,trans*-6-Methyl-3-methylen-tricyclo[5.4.0.0<sup>2,6</sup>]undecane (1e) and *cis,anti,cis*-6-Methyl-3-methylen-tricyclo[5.4.0.0<sup>2,6</sup>]undecane (1f)**

A mixture of **1e-f** (30:70) was obtained from a mixture (30:70) of **3e-f** according to procedure C in 96 % yield. Analytical pure samples of **1e** and **1f** were obtained by preparative GC.

**1e**: colorless oil.

IR (film): 3075, 2931, 2746, 1651, 1451, 1372, 1309, 1247, 1191, 1091, 1014, 917, 907, 876, 834, 747, 686, 665  $\text{cm}^{-1}$ .

$^1\text{H-NMR}$  ( $\text{C}_6\text{D}_6$ ):  $\delta$  = 1.068 (s, 3 H, C-13), 1.106-1.305 (m, 6 H), 1.401 (dddd, 1 H,  $J$  = 11.3 Hz, 11.3 Hz, 8.2 Hz, 3.2 Hz), 1.517-1.551 (m, 1 H), 1.646-1.680 (m, 2 H), 1.762-1.796 (m, 1 H), 2.014 (ddd, 1 H,  $J$  = 13.2 Hz, 9.6 Hz, 9.6 Hz), 2.431 (d, 1 H,  $J$  = 8.2 Hz), 2.567 (dddd, 2 H,  $J$  = 9.7 Hz, 7.4 Hz, 2.3 Hz, 2.3 Hz), 4.869 (ddd, 2 H,  $J$  = 1.7 Hz, 1.7 Hz, 1.7 Hz, 12-H).

$^{13}\text{C}$ -NMR ( $\text{C}_6\text{D}_6$ ):  $\delta$  = 26.63 ( $\text{CH}_3$ , C-13), 26.68 ( $\text{CH}_2$ ), 27.29 ( $\text{CH}_2$ ), 27.76 ( $\text{CH}_2$ ), 31.04 ( $\text{CH}_2$ ), 31.41 ( $\text{CH}_2$ ), 35.97 ( $\text{CH}_2$ ), 46.58 (CH), 50.97 (CH), 51.46 ( $\text{C}_q$ , C-6), 60.00 (CH), 103.94 ( $\text{CH}_2$ , C-12), 155.57 ( $\text{C}_q$ , C-3).

GC/MS (EI, 70 eV):  $m/z$  (%) = 176 (7) [ $\text{M}^+$ ], 161 (10) [ $\text{M}^+-\text{CH}_3$ ], 148 (20), 147 (13), 133 (15), 119 (20), 108 (19), 107 (78), 106 (18), 105 (40), 95 (12), 94 (66), 93 (44), 92 (15), 91 (62), 81(15), 80 (18), 79 (100), 78 (10), 77 (34), 67 (23), 65 (14), 55 (24), 53 (24), 51 (11), 41 (43), 39 (31), 29 (17), 27 (25).

HRMS:  $m/z$  calcd for  $\text{C}_{13}\text{H}_{20}$  ( $\text{M}^+$ ), 176.15650; found, 176.15601.

**1f**: colorless oil.

IR (film): 3074, 2933, 2866, 1656, 1449, 1375, 878, 665  $\text{cm}^{-1}$ .

$^1\text{H}$ -NMR ( $\text{C}_6\text{D}_6$ ):  $\delta$  = 1.077 (s, 3 H, 13-H), 1.157-1.273 (m, 2 H), 1.351-1.518 (m, 6 H), 1.603-1.684 (m, 2 H), 1.921-2.001 (m, 2 H), 2.332 (d, 1 H,  $J$  = 3.9 Hz), 2.382 (dddd, 1 H,  $J$  = 15.7 Hz, 8.1 Hz, 4.6 Hz, 1.6 Hz, 1.6 Hz), 2.604-2.682 (m, 1 H), 4.851 (dddd, 1 H,  $J$  = 2.5 Hz, 1.4 Hz, 1.4 Hz, 1.4 Hz, 12-H), 4.888 (dddd, 1 H,  $J$  = 1.7 Hz, 1.7 Hz, 1.7 Hz, 1.7 Hz, 12-H).

$^{13}\text{C}$ -NMR ( $\text{C}_6\text{D}_6$ ):  $\delta$  = 22.00 ( $\text{CH}_2$ ), 22.10 ( $\text{CH}_3$ , C-13), 22.23 ( $\text{CH}_2$ ), 22.38 ( $\text{CH}_2$ ), 27.36 ( $\text{CH}_2$ ), 34.34 ( $\text{CH}_2$ ), 36.27 (CH), 37.88 (CH), 41.17 ( $\text{CH}_2$ ), 47.33 ( $\text{C}_q$ , C-6), 55.57 (CH), 104.45 ( $\text{CH}_2$ , C-12), 157.42 ( $\text{C}_q$ , C-3).

GC/MS (EI, 70 eV):  $m/z$  (%) = 176 (9) [ $\text{M}^+$ ], 161 (10) [ $\text{M}^+-\text{CH}_3$ ], 148 (23), 147 (14), 133 (12), 119 (15), 108 (11), 107 (34), 106 (11), 105 (26), 95 (13), 94 (75), 93 (31), 92 (10), 91 (39), 81 (13), 80 (14), 79 (100), 77 (28), 67 (16), 65 (10), 55 (16), 53 (19), 41 (30), 39 (24), 29 (11), 27 (18).

HRMS:  $m/z$  calcd for  $\text{C}_{13}\text{H}_{20}$  ( $\text{M}^+$ ), 176.15650; found, 176.15614.

- 1 (a) B. C. Ranu, D. C. Sarkar and M. K. Basu, A simple and efficient route towards usefully functionalised six and seven-membered ring systems via  $\alpha$ -hydroxycyclobutane Rearrangement followed by retroaldol cleavage, *Tetrahedron*, 1989, **45**, 3107-3114.
- (b) P. E. Eaton, On the Mechanism of the Photodimerization of Cyclopentenone. *J. Am. Chem. Soc.*, 1962, **84**, 2454-2455.
- (c) G. L. Lange and C. Gottardo,  $^{13}\text{C}$  NMR and  $^1\text{H}$  NMR Study of Substituted Tricyclic [2+2] Photoadducts, *Magn. Res. Chem.*, 1996, **34**, 660-666.
- (d) R. M. Bowman, C. Calvo, J. J. McCullough, P. W. Rasmussen, F. F. Snyder, Photoadditions of 2-Cyclohexenone Derivatives to Cyclopentene. An Investigation of Stereochemistry, *J. Org. Chem.*, 1972, **37**, 2084-2091.
- (e) D. Valentine, N. J. Turro, Jr. and G. S. Hammond, Thermal and Photosensitized Dimerizations of Cyclohexadiene, *J. Am. Chem. Soc.*, 1964, **86**, 5202-5208.
- 2 J. Grota, I. Domke, I. Stoll, T. Schröder and J. Mattay, Synthesis, Fragmentation and Rearrangement Reactions of Annellated Cyclobutylcarbinols, *Synthesis*, 2005, in press.
- 3 R. Anderson, Synthetic Applications of Chloromethyltrimethylsilane, *Synthesis*, 1985, 717-734.
- 4 (a) P. F. Hurlik and D. Peterson, Stereospecific Olefin-Forming Elimination Reaction of  $\beta$ -Hydroxyalkylsilanes, *J. Am. Chem. Soc.*, 1975, **97**, 1464-1468.
- (b) D. J. Ager, The Peterson Reaction, *Synthesis*, 1984, 384-398.
